# Supplementary material
Source: Springer Nature journal article supplement (https://www.springermedizin.de/resource/supplementary/12937_2006_138_MOESM3_ESM.pdf/25654476)

Average RQ for Room Calorimeter

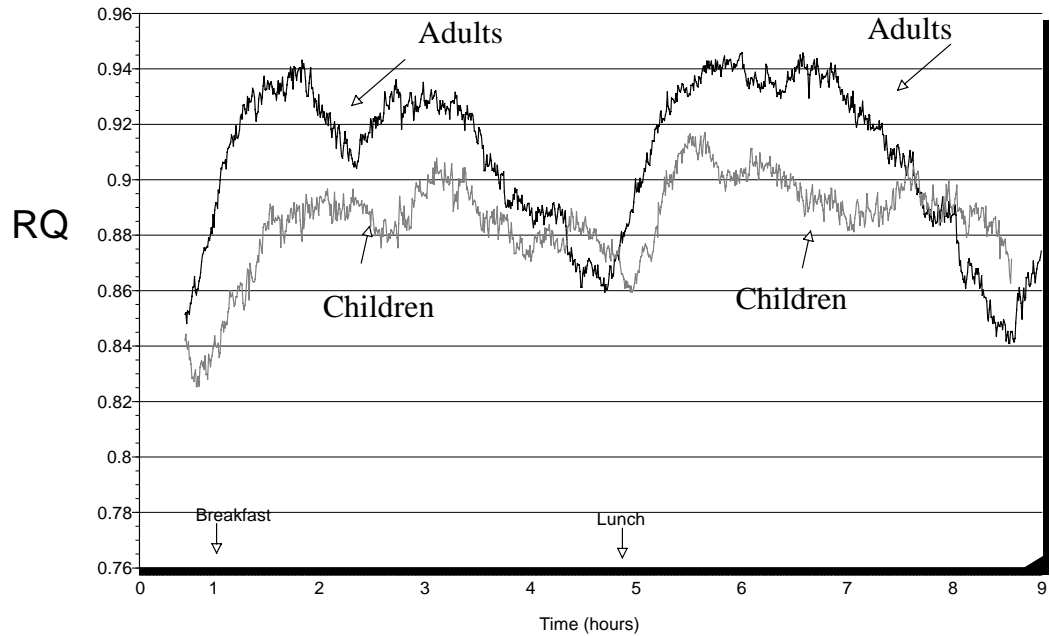

Supplement: MOESM3 [file 25654476]
